# Supplementary material
Source: Springer Nature journal article supplement (https://www.springermedizin.de/resource/supplementary/12986_2009_205_MOESM3_ESM.pdf/25655588)

**A**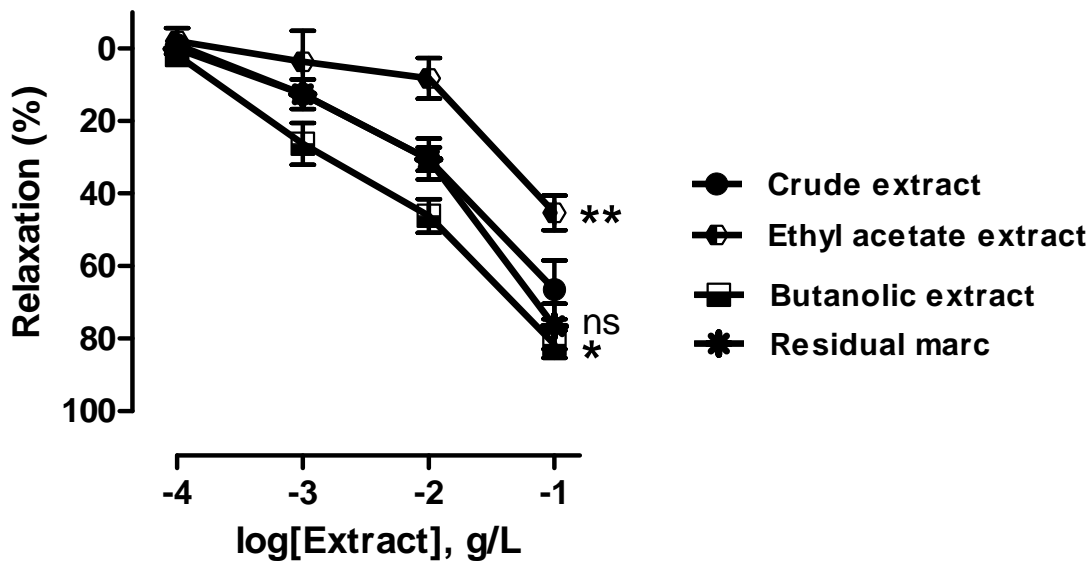**B**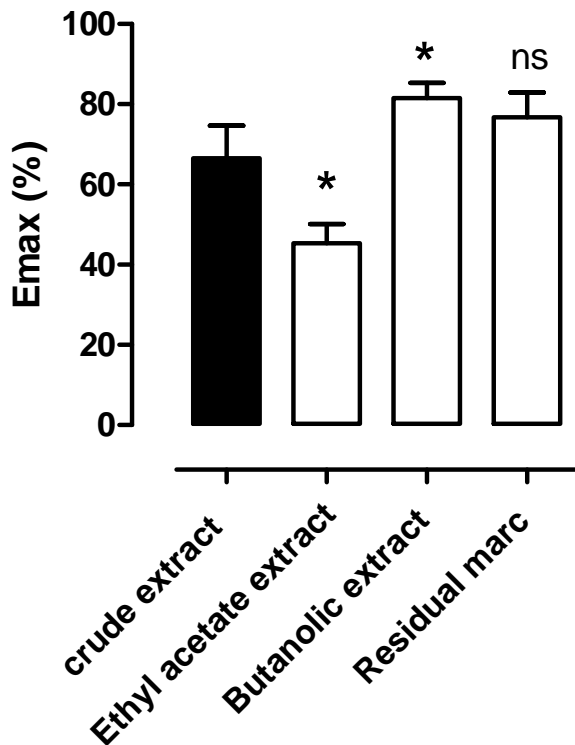

Supplement: MOESM3 [file 25655588]
